# Supplementary material for: Effects of sex and joint action on voluntary activation
Source: PeerJ. 2018 Nov 15;6:e5968. doi: 10.7717/peerj.5968 (PMC6240438; doi:10.7717/peerj.5968)
Supplement: Supplemental Information 1 [file peerj-06-5968-s001.xlsx]

## Sheet: Sheet1
	Women
		VA%			Nomalized twitch0-50
	ID	Knee extension	Plantar flexion in K0	Plantar flexion in K90	Knee extension	Plantar flexion in K0	Plantar flexion in K90
	1	87.7	82.3	66.7	65.93	51.85	54.58
	2	95.2	81.4	65.1	69.32	56.1	59.21
	3	77.5	62.4	75.1	68.62	54.97	56.48
	4	99	94.7	96.8	64.89	55.85	49.91
	5	96.3	95.2	99.5	62.62	48.98	53.88
	6	96	90.4	90.3	67.39	50.19	53.22
	7	100	95.9	89.7	68.42	49.19	53.14
	8	88.5	80.4	99	66.74	56.04	55.75
	9	98.2	100	99.2	64.52	46.16	54.03
	10	94.5	87.1	94	58.5	48.79	51.97
	11	93.2	98.7	95.4	56.99	55.46	55.58
	12	93.8	81.4	99	67.79	42.09	39.15
	13	97.8	91.7	97.2	63.82	50.59	49.36
	14	94.3	94.2	98.9	62.63	54	55.75
	Men
		VA%			Nomalized twitch0-50
	ID	Knee extension	Plantar flexion in K0	Plantar flexion in K90	Knee extension	Plantar flexion in K0	Plantar flexion in K90
	1	91.3	99.6	99.6	78.74	58.78	52.18
	2	97.7	98	99.8	70.25	55.01	59.27
	3	91.4	99.4	97.5	65.62	52.46	46.69
	4	98.3	93.9	91.8	60.1	54.7	54.75
	5	92.6	98.6	97.7	64.11	53.62	55.76
	6	91.6	94.8	97.7	60.36	56.85	59.82
	7	95.3	95.7	99.7	59.74	53.6	54.3
	8	100	99.2	100	54.64	44.14	43.75
	9	97.3	100	99.1	55.22	45.5	44.43
	10	97.9	95.4	97.9	61	52.12	52.37
	11	98.2	99.1	97.8	57.88	51.12	44.26
	12	98.5	99.7	99.1	68.29	43.35	40.69
	13	86.9	74.3	78.9	62.28	46.44	47.01
	14	93	99.6	99	70.89	57.43	60.25
